# Supplementary material for: Freestanding Films of Reduced Graphene Oxide Fully Decorated with Prussian Blue Nanoparticles for Hydrogen Peroxide Sensing
Source: PubMed Central journal article supplement (PMC11270561; doi:10.1021/acsomega.4c01457), 2024-07-10
Supplement: ao4c01457_si_001.pdf [file ao4c01457_si_001.pdf]

# Freestanding Films of Reduced Graphene Oxide Fully Decorated with Prussian Blue Nanoparticles for Hydrogen Peroxide Sensing

*Vitor H.N. Martins†; Monize M. da Silva†; Daniel A. Gonçalves†; Volker Presser‡¥§,*

*Samantha Husmann‡; Victor H.R. Souza†\**

† Faculty of Exact Science and Technology, Universidade Federal da Grande Dourados,  
Dourados, MS, Brazil

‡ INM – Leibniz Institute for New Materials, Campus D2-2, 66123, Saarbrücken, Germany

¥ Department of Materials Science & Engineering, Saarland University, Campus D2 2,  
66123, Saarbrücken, Germany

§ Saarene – Saarland Center for Energy Materials and Sustainability, Campus C4 2, 66123  
Saarbrücken, Germany

\* Corresponding author: [victorsouza@ufgd.edu.br](mailto:victorsouza@ufgd.edu.br);

## Supporting information

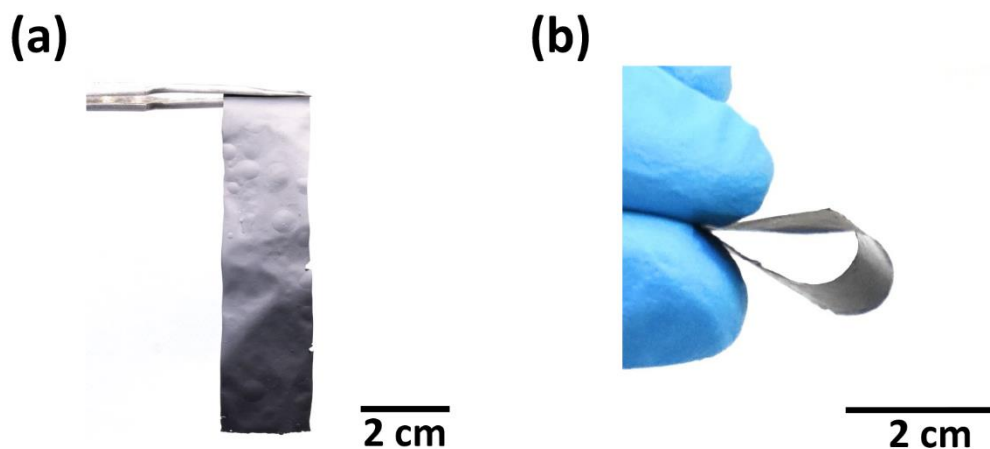

**Figure S1.** Photographic images of rGO/PAni/Fe<sub>2</sub>O<sub>3</sub> freestanding films (a) as-synthesized, and (b) under mechanical deformation.

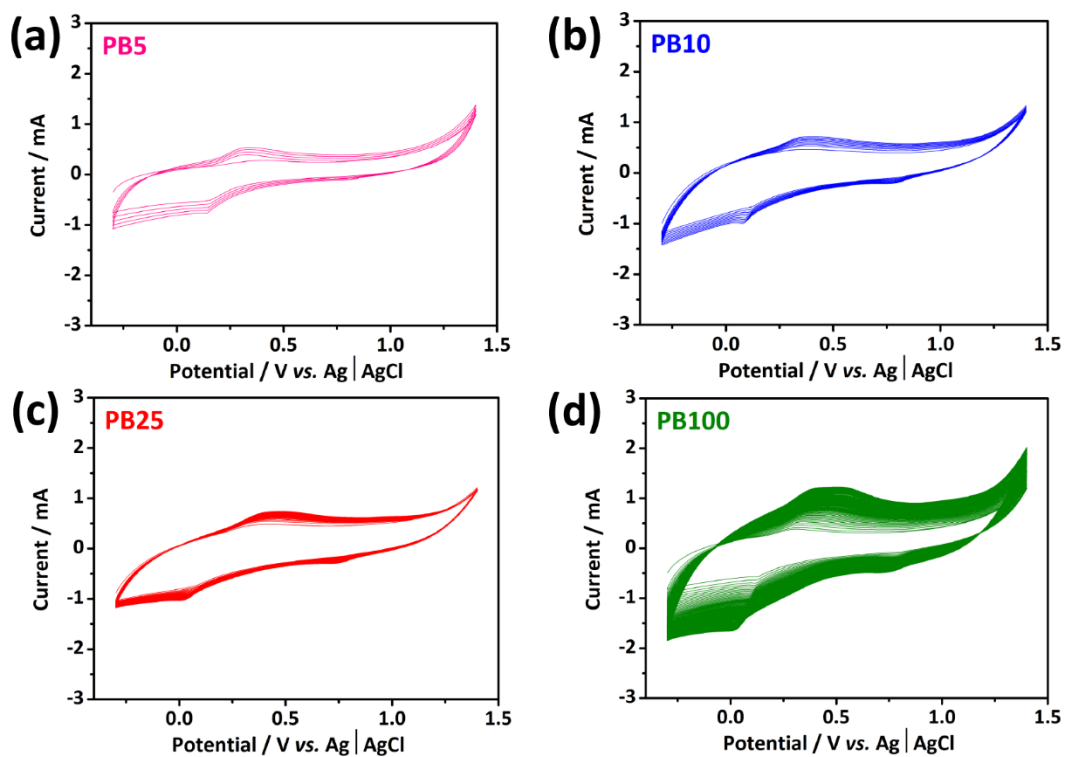

**Figure S2.** Electrochemical profile of PB growth over the graphene-based electrodes for samples PB5(a), PB10 (b), PB25 (c), and PB100 (d).

## Supporting information

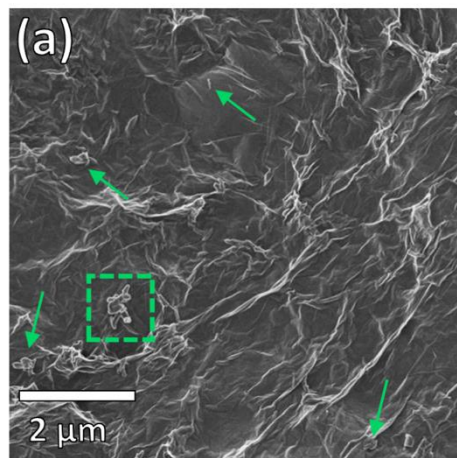

**Figure S3.** SEM image for rGO/PANI film.

## Supporting information

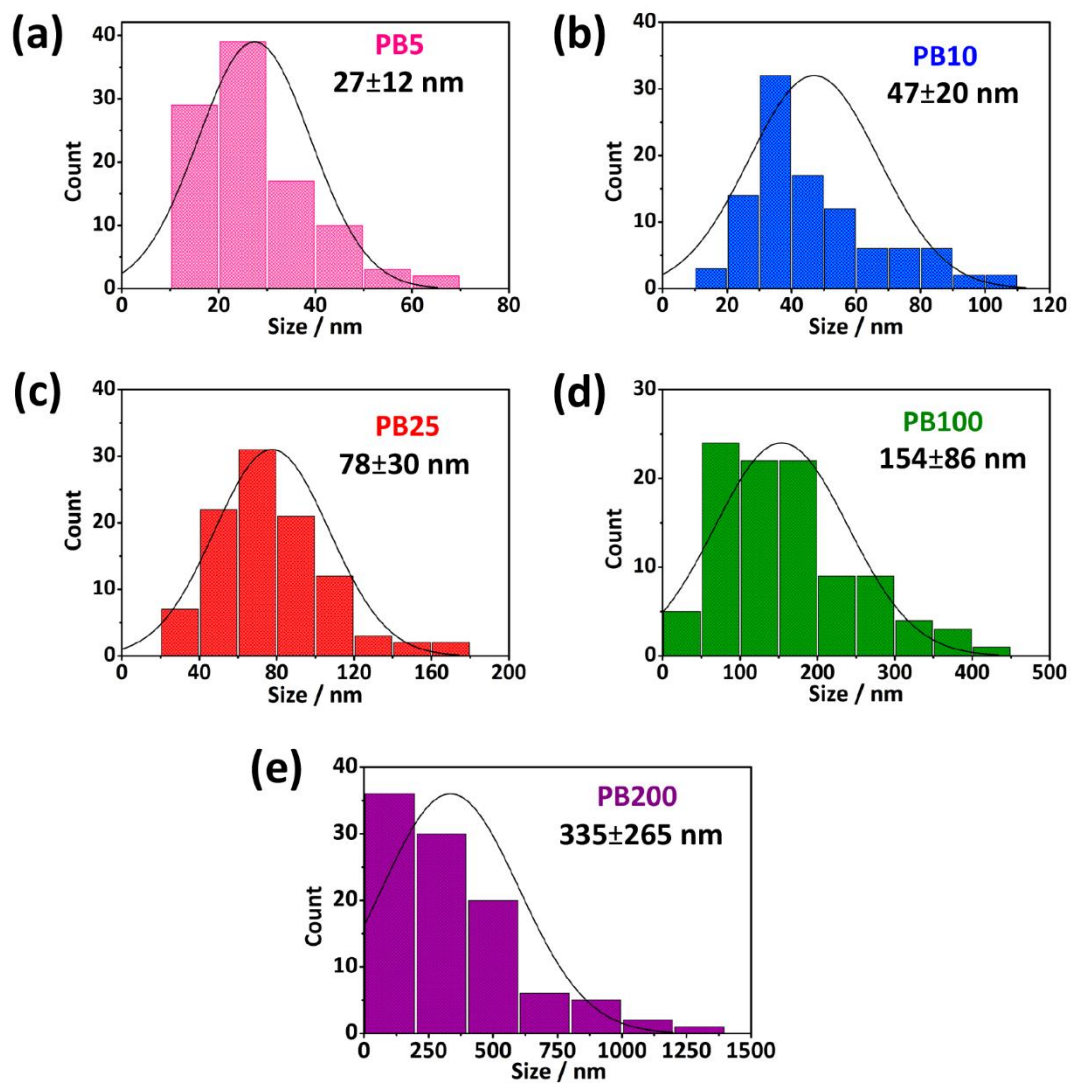

**Figure S4.** Size distribution of PB cubes in samples PB5 (a), PB10 (b), PB25 (c), PB100 (d), and PB200 (e).

## Supporting information

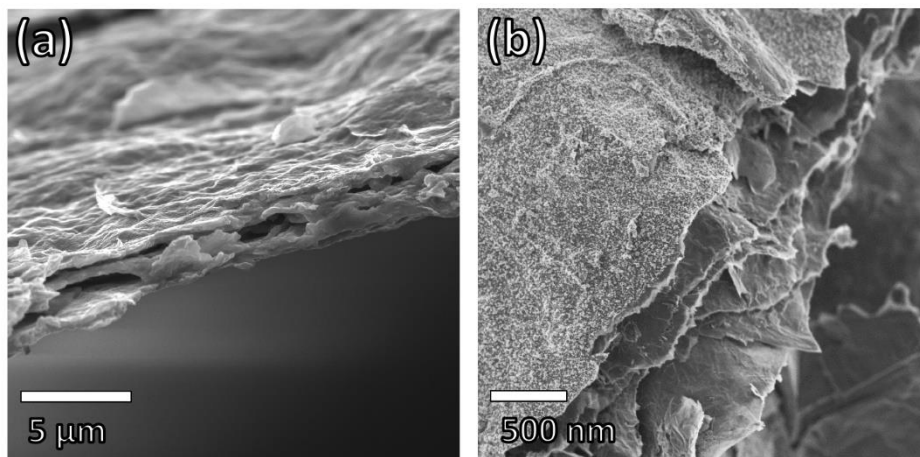

**Figure S5.** Cross-sectional images of the freestanding film before (a) and after (b) the electrodeposition of PB particles (PB100).

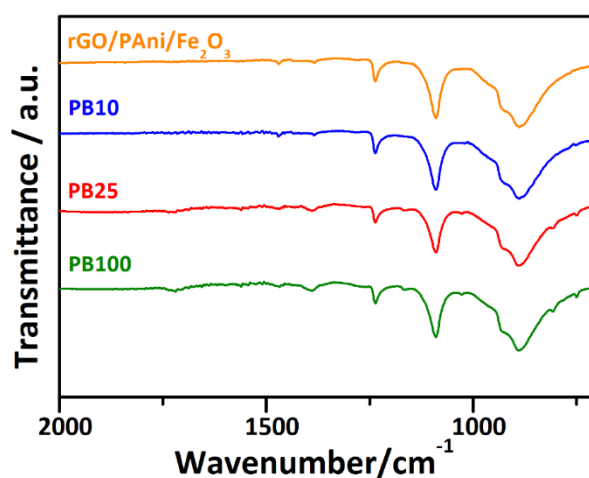

**Figure S6.** FTIR spectra of the bare electrode (rGO/PAni/Fe<sub>2</sub>O<sub>3</sub>) and samples PB10, PB25, and PB100.

The FTIR spectra of the bare sample (rGO/PAni/Fe<sub>2</sub>O<sub>3</sub>) and PB10, PB25, and PB100 electrodes are depicted in Figure S5. The three main bands observed in all samples at 1236, 1090, and 888 cm<sup>-1</sup> correspond to  $\nu_{C-N}$  in benzenoid rings of PAni;  $\nu_{-NH^{+\bullet}}$  of PAni, indicating the presence of the polymer in emeraldine salt protonated form, and  $\gamma_{C-H}$  of both 1,4 and 1,2,4 rings. All bands confirm the presence of PAni in its conductive form.<sup>1-5</sup>

## Supporting information

1. Trchová, M.; Stejskal, J. Polyaniline: The Infrared Spectroscopy of Conducting Polymer Nanotubes (IUPAC Technical Report). Pure Appl. Chem. 2011, 83, 1803–1817.
2. Quillard, S.; Louarn, G.; Lefrant, S.; Macdiarmid, A. G. Vibrational Analysis of Polyaniline: A Comparative Study of Leucoemeraldine, Emeraldine, and Pernigraniline Bases. Phys. Rev. B: Condens. Matter Mater. Phys. 1994, 50, 12496–12508.
3. Ping, Z.; Nauer, B. G. E.; Neugebauer, H.; Theiner, J.; Neckel, A.; Neckel, A. Protonation and Electrochemical Redox Doping Processes of Polyaniline in Aqueous Solutions: Investigations Using In Situ FTIR-ATR Spectroscopy and a New Doping System. J. Chem. Soc., Faraday Trans. 1997, 93, 121–129
4. Kang, E.; Neoh, K. G.; Tan, K. L. Polyaniline: A Polymer with Many Interesting Intrinsic Redox States. Prog. Polym. Sci. 1998, 23, 277–324.
5. Martins, V. H. N., Siqueira, N. M. S., Fonsaca, J. E. S., Domingues, S. H. & Souza, V. H. R. Ternary Nanocomposites of Reduced Graphene Oxide, Polyaniline, and Iron Oxide Applied for Energy Storage. ACS Applied Nano Materials 2021, 4, 5553-5563.

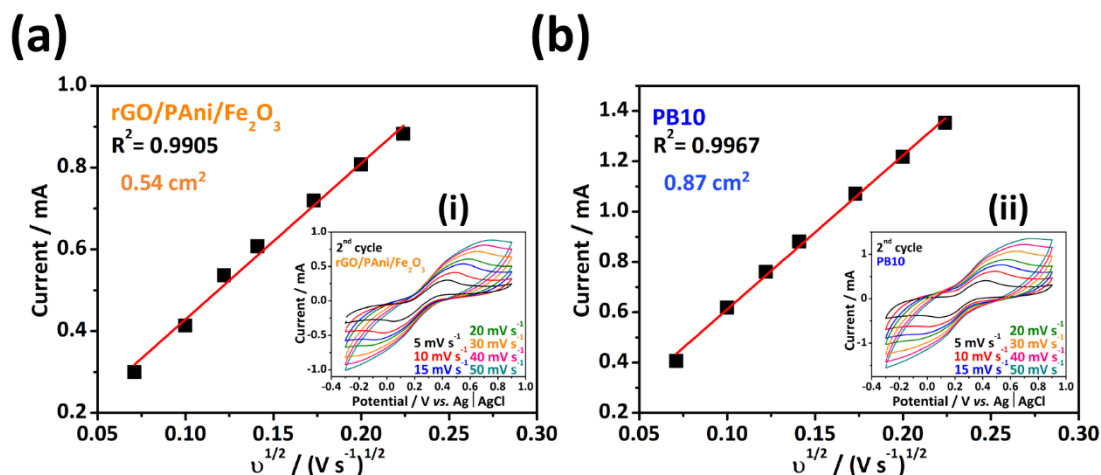

**Figure S7** – Anodic peak current vs. square root of the scan rate of rGO/PANI/Fe<sub>2</sub>O<sub>3</sub> (a) and PB10 (b) electrodes. Insets: Cyclic voltammograms at different scan rates of rGO/PANI/Fe<sub>2</sub>O<sub>3</sub> (i) and PB10 (ii) electrodes.

## Supporting information

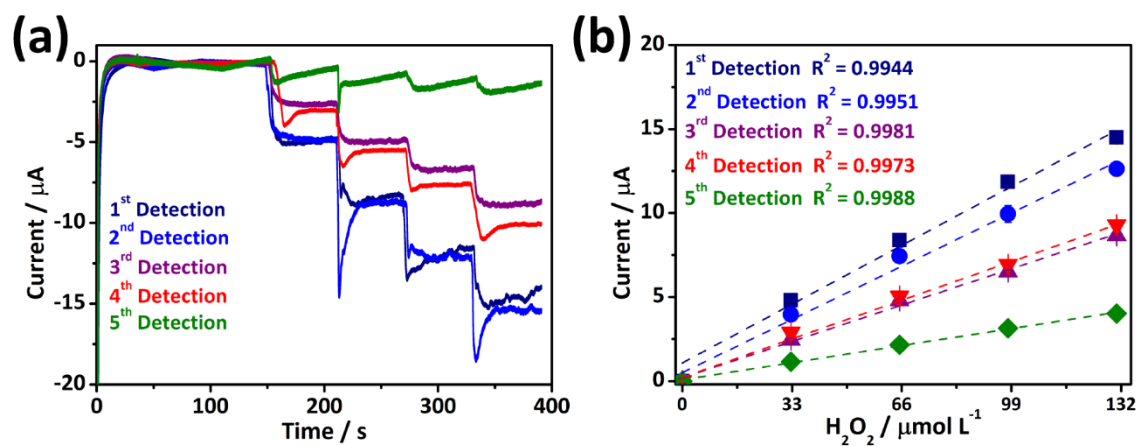

**Figure S8.** (a) Multiple chronoamperometric detections of H<sub>2</sub>O<sub>2</sub> every 24 hours, and (b) the analytical curve calculated from (a).

**Table S1.** Electrochemical performance for H<sub>2</sub>O<sub>2</sub> detection of the freestanding films synthesized in this work.

| Sample                                  | Limit of detection ( $\mu\text{M}$ ) | Limits of quantification ( $\mu\text{M}$ ) |
|-----------------------------------------|--------------------------------------|--------------------------------------------|
| rGO/PAni/Fe <sub>2</sub> O <sub>3</sub> | 25.0                                 | 85.0                                       |
| PB5                                     | 5.0                                  | 15.0                                       |
| PB10                                    | 2.0                                  | 7.0                                        |
| PB25                                    | 4.0                                  | 10.0                                       |
| PB100                                   | 20.0                                 | 80.0                                       |
